# Supplementary material for: Effects of an Extract of the Brown Seaweed Ascophylum nodosum on Postprandial Glycaemic Control in Healthy Subjects: A Randomized Controlled Study
Source: Mar Drugs. 2023 May 31;21(6):337. doi: 10.3390/md21060337 (PMC10303464; doi:10.3390/md21060337)
Supplement: Supplementary file 1 [file marinedrugs-21-00337-s001.zip]

Archive with 5 entries (5 files):
- Figure S1.jpg
- Figure S2.jpg
- Figure S3.jpg
- Figure S4.jpg
- Table S1. Consort-2010-checklist.pdf
